# Supplementary material
Source: MDPI journal article supplement (https://www.mdpi.com/2076-3417/11/17/8219)
Supplement: s1 [file s1]

# Supplementary Materials

## An In Vitro Study of Antibacterial Properties of Electrospun *Hypericum Perforatum* Oil-Loaded Poly(lactic acid) Nonwovens for Potential Biomedical Applications

Ayben Pakolpakçıl<sup>1,\*</sup>, Zbigniew Draczyński<sup>1</sup>, Justyna Szulc<sup>2</sup>, Dawid Stawski<sup>1</sup>, Nina Tarzyńska<sup>1</sup>, Anna Bednarowicz<sup>1</sup>, Dominik Sikorski<sup>1</sup>, Cesar Hernandez<sup>1</sup>, Sławomir Sztajnowski<sup>1</sup>, Izabella Krucińska<sup>1</sup>, Beata Gutarowska<sup>2</sup>

<sup>1</sup>Institute of Materials Science of Textiles and Polymer Composites, Lodz University of Technology, 116 Żeromskiego Street 90-924 Lodz, Poland; zbigniew.draczynski@p.lodz.pl; dawid.stawski@p.lodz.pl; nina.tarzynska@dokt.p.lodz.pl; anna.bednarowicz@dokt.p.lodz.pl; dominik.sikorski@dokt.p.lodz.pl; cesar.hernandez@dokt.p.lodz.pl; slawomir.sztajnowski@p.lodz.pl; izabella.krucinska@p.lodz.pl

<sup>2</sup>Department of Environmental Biotechnology, Faculty of Biotechnology and Food Sciences, Lodz University of Technology, ul. Wólczarska 171/173, 90-924 Lodz, Poland; justyna.skora@p.lodz.pl; beata.gutarowska@p.lodz.pl

\*Correspondence: [ayben\\_p@yahoo.com](mailto:ayben_p@yahoo.com)

| Micro<br>organi<br>sms       | Sample       | Time                                                                                |                                                                                      |
|------------------------------|--------------|-------------------------------------------------------------------------------------|--------------------------------------------------------------------------------------|
|                              |              | T=0                                                                                 | T=24 h                                                                               |
| <i>Staphylococcus aureus</i> | Cotton gauze | 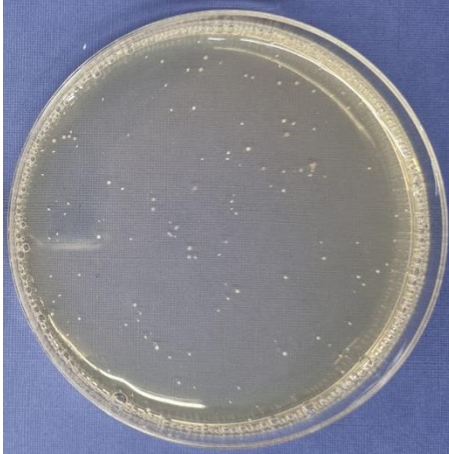   |    |
|                              | PLA          |   |   |
|                              | 5HPO/PLA     |  |  |

|                         |                                                                                     |                                                                                      |
|-------------------------|-------------------------------------------------------------------------------------|--------------------------------------------------------------------------------------|
| <i>Escherichia coli</i> |                                                                                     |                                                                                      |
| Cotton gauze            |    |    |
| PLA                     |   |   |
| 5HPO/PLA                |  |  |

**Figure S1:** Images of the petri dishes showing the antibacterial activity of samples.
